# Supplementary material for: GCK Gene-Body Hypomethylation Is Associated with the Risk of Coronary Heart Disease
Source: PubMed Central journal article supplement (PMC3947703; doi:10.1155/2014/151723), 2014-02-17
Supplement: 151723.f1.pdf [file 151723.f1.pdf]

Supplemental Table 1: The raw data of methylation levels of the four CpG sites on GCK gene body

| No. | Age | Gender | Group | Smoking | Hypertension | Diabetes | CpG1 | CpG2 | CpG3 | CpG4 | Mean |
|-----|-----|--------|-------|---------|--------------|----------|------|------|------|------|------|
| 1   | 52  | 1      | 1     | 0       | 1            | 1        | 55   | 53   | 73   | 58   | 60   |
| 2   | 54  | 1      | 1     | 0       | 1            | 0        | 61   | 54   | 60   | 37   | 53   |
| 3   | 54  | 1      | 1     | 1       | 0            | 0        | 52   | 49   | 61   | 55   | 54   |
| 4   | 56  | 1      | 1     | 1       | 0            | 0        | 44   | 43   | 55   | 52   | 49   |
| 5   | 60  | 1      | 1     | 1       | 0            | 0        | 67   | 34   | 65   | 58   | 56   |
| 6   | 61  | 1      | 1     | 1       | 0            | 0        | 52   | 21   | 58   | 51   | 46   |
| 7   | 62  | 1      | 1     | 0       | 1            | 1        | 45   | 38   | 48   | 42   | 43   |
| 8   | 62  | 1      | 1     | 1       | 1            | 0        | 47   | 40   | 53   | 46   | 47   |
| 9   | 63  | 1      | 1     | 1       | 1            | 0        | 41   | 40   | 58   | 40   | 45   |
| 10  | 63  | 1      | 1     | 0       | 1            | 0        | 37   | 32   | 41   | 38   | 37   |
| 11  | 63  | 1      | 1     | 1       | 1            | 0        | 51   | 49   | 52   | 51   | 51   |
| 12  | 64  | 1      | 1     | 0       | 1            | 0        | 45   | 41   | 49   | 46   | 45   |
| 13  | 65  | 1      | 1     | 1       | 0            | 1        | 57   | 45   | 68   | 56   | 57   |
| 14  | 66  | 1      | 1     | 0       | 1            | 0        | 41   | 33   | 41   | 43   | 40   |
| 15  | 67  | 1      | 1     | 0       | 1            | 0        | 50   | 56   | 69   | 39   | 54   |
| 16  | 68  | 1      | 1     | 1       | 1            | 0        | 65   | 58   | 62   | 52   | 59   |
| 17  | 70  | 1      | 1     | 0       | 0            | 0        | 52   | 44   | 62   | 54   | 53   |
| 18  | 71  | 1      | 1     | 1       | 1            | 0        | 41   | 39   | 54   | 47   | 45   |
| 19  | 52  | 2      | 1     | 0       | 1            | 0        | 60   | 36   | 48   | 39   | 46   |
| 20  | 54  | 2      | 1     | 0       | 0            | 0        | 49   | 45   | 55   | 46   | 49   |
| 21  | 54  | 2      | 1     | 0       | 1            | 0        | 46   | 44   | 58   | 48   | 49   |
| 22  | 55  | 2      | 1     | 1       | 0            | 0        | 48   | 43   | 59   | 47   | 49   |
| 23  | 60  | 2      | 1     | 0       | 0            | 0        | 63   | 55   | 51   | 58   | 57   |

|    |    |   |   |   |   |   |    |    |    |    |    |
|----|----|---|---|---|---|---|----|----|----|----|----|
| 24 | 62 | 2 | 1 | 0 | 1 | 1 | 64 | 58 | 77 | 67 | 67 |
| 25 | 63 | 2 | 1 | 0 | 1 | 0 | 47 | 42 | 56 | 45 | 48 |
| 26 | 63 | 2 | 1 | 0 | 1 | 0 | 49 | 49 | 64 | 44 | 52 |
| 27 | 63 | 2 | 1 | 0 | 1 | 1 | 40 | 35 | 45 | 44 | 41 |
| 28 | 64 | 2 | 1 | 0 | 0 | 0 | 63 | 42 | 58 | 61 | 56 |
| 29 | 64 | 2 | 1 | 0 | 1 | 0 | 41 | 36 | 60 | 39 | 44 |
| 30 | 65 | 2 | 1 | 0 | 1 | 0 | 53 | 47 | 69 | 58 | 57 |
| 31 | 65 | 2 | 1 | 0 | 0 | 0 | 49 | 46 | 57 | 53 | 51 |
| 32 | 66 | 2 | 1 | 1 | 0 | 0 | 56 | 49 | 63 | 56 | 56 |
| 33 | 68 | 2 | 1 | 0 | 0 | 0 | 45 | 46 | 51 | 39 | 45 |
| 34 | 68 | 2 | 1 | 0 | 0 | 0 | 46 | 40 | 57 | 52 | 49 |
| 35 | 70 | 2 | 1 | 0 | 0 | 1 | 35 | 40 | 41 | 50 | 42 |
| 36 | 72 | 2 | 1 | 0 | 1 | 1 | 43 | 41 | 47 | 48 | 45 |
| 37 | 52 | 1 | 0 | 1 | 0 | 0 | 41 | 40 | 48 | 38 | 42 |
| 38 | 54 | 1 | 0 | 1 | 0 | 0 | 51 | 41 | 55 | 47 | 49 |
| 39 | 55 | 1 | 0 | 1 | 1 | 0 | 52 | 45 | 58 | 50 | 51 |
| 40 | 56 | 1 | 0 | 0 | 0 | 0 | 51 | 52 | 66 | 56 | 56 |
| 41 | 59 | 1 | 0 | 1 | 0 | 0 | 62 | 42 | 66 | 61 | 58 |
| 42 | 59 | 1 | 0 | 1 | 0 | 0 | 67 | 63 | 75 | 63 | 67 |
| 43 | 60 | 1 | 0 | 1 | 0 | 0 | 61 | 51 | 66 | 54 | 58 |
| 44 | 60 | 1 | 0 | 0 | 1 | 0 | 52 | 51 | 65 | 47 | 54 |
| 45 | 62 | 1 | 0 | 0 | 0 | 0 | 54 | 49 | 66 | 49 | 55 |
| 46 | 62 | 1 | 0 | 0 | 0 | 0 | 48 | 43 | 56 | 50 | 49 |
| 47 | 63 | 1 | 0 | 1 | 0 | 0 | 59 | 55 | 69 | 63 | 62 |
| 48 | 63 | 1 | 0 | 1 | 1 | 0 | 43 | 43 | 45 | 45 | 44 |
| 49 | 65 | 1 | 0 | 0 | 0 | 1 | 52 | 50 | 62 | 52 | 54 |

|    |    |   |   |   |   |   |    |    |    |    |    |
|----|----|---|---|---|---|---|----|----|----|----|----|
| 50 | 65 | 1 | 0 | 1 | 1 | 0 | 55 | 52 | 72 | 59 | 60 |
| 51 | 66 | 1 | 0 | 1 | 1 | 1 | 45 | 38 | 53 | 52 | 47 |
| 52 | 67 | 1 | 0 | 1 | 0 | 0 | 57 | 62 | 65 | 57 | 60 |
| 53 | 70 | 1 | 0 | 1 | 1 | 0 | 64 | 59 | 73 | 62 | 65 |
| 54 | 72 | 1 | 0 | 0 | 1 | 1 | 59 | 56 | 68 | 60 | 61 |
| 55 | 52 | 2 | 0 | 0 | 0 | 0 | 44 | 45 | 64 | 55 | 52 |
| 56 | 54 | 2 | 0 | 0 | 1 | 0 | 61 | 51 | 68 | 61 | 60 |
| 57 | 55 | 2 | 0 | 0 | 0 | 0 | 57 | 56 | 65 | 55 | 58 |
| 58 | 56 | 2 | 0 | 0 | 0 | 0 | 50 | 50 | 60 | 45 | 51 |
| 59 | 60 | 2 | 0 | 0 | 0 | 0 | 44 | 45 | 59 | 53 | 50 |
| 60 | 60 | 2 | 0 | 0 | 1 | 0 | 50 | 62 | 50 | 54 | 54 |
| 61 | 60 | 2 | 0 | 0 | 0 | 0 | 48 | 45 | 59 | 55 | 52 |
| 62 | 61 | 2 | 0 | 0 | 0 | 0 | 51 | 51 | 68 | 61 | 58 |
| 63 | 62 | 2 | 0 | 0 | 1 | 1 | 44 | 38 | 54 | 46 | 46 |
| 64 | 62 | 2 | 0 | 0 | 0 | 0 | 60 | 60 | 73 | 64 | 64 |
| 65 | 63 | 2 | 0 | 0 | 1 | 0 | 61 | 53 | 69 | 52 | 59 |
| 66 | 63 | 2 | 0 | 0 | 1 | 0 | 54 | 51 | 62 | 47 | 54 |
| 67 | 63 | 2 | 0 | 0 | 0 | 1 | 40 | 34 | 47 | 44 | 41 |
| 68 | 66 | 2 | 0 | 0 | 1 | 0 | 66 | 60 | 81 | 66 | 68 |
| 69 | 67 | 2 | 0 | 0 | 0 | 1 | 59 | 52 | 66 | 53 | 58 |
| 70 | 68 | 2 | 0 | 0 | 1 | 1 | 28 | 28 | 33 | 39 | 32 |
| 71 | 68 | 2 | 0 | 0 | 0 | 0 | 55 | 58 | 69 | 61 | 61 |
| 72 | 70 | 2 | 0 | 0 | 1 | 0 | 53 | 48 | 59 | 56 | 54 |

Gender: 1 = Male, 2 = Female; Group: 1 = Case, 0 = Control; Smoking: 1 = Yes, 0 = No; Hypertension: 1 = Yes, 0 = No; Diabetes: 1 = Yes, 0 =

No; Methylation levels of the four CpG sites and mean levels were presented in the form of percentage (%).

Supplemental Table 2: Correlation between *GCK* gene DNA methylation and biochemical indicators in cases

| Case                            | CpG1     |          | CpG2     |          | CpG3     |          | CpG4     |          |
|---------------------------------|----------|----------|----------|----------|----------|----------|----------|----------|
|                                 | <i>r</i> | <i>P</i> | <i>r</i> | <i>P</i> | <i>r</i> | <i>P</i> | <i>r</i> | <i>P</i> |
| correlation with<br>methylation |          |          |          |          |          |          |          |          |
| TG                              | -0.339   | 0.062    | -0.364   | 0.044*   | -0.420   | 0.019*   | -0.286   | 0.119    |
| TC                              | -0.295   | 0.107    | -0.345   | 0.057    | -0.229   | 0.215    | -0.166   | 0.371    |
| HDL                             | -0.170   | 0.361    | -0.140   | 0.451    | -0.015   | 0.934    | 0.020    | 0.915    |
| LDL                             | 0.146    | 0.434    | 0.078    | 0.678    | 0.392    | 0.029*   | 0.229    | 0.215    |
| ApoA                            | -0.096   | 0.609    | -0.071   | 0.705    | 0.085    | 0.650    | -0.099   | 0.598    |
| ApoB                            | -0.295   | 0.107    | -0.357   | 0.048*   | -0.247   | 0.181    | -0.240   | 0.194    |
| ApoE                            | 0.079    | 0.673    | -0.065   | 0.730    | 0.161    | 0.387    | 0.114    | 0.541    |
| Lp(a)                           | 0.125    | 0.501    | 0.108    | 0.565    | 0.160    | 0.390    | 0.318    | 0.081    |
| hs-CRP                          | -0.193   | 0.298    | -0.224   | 0.226    | -0.041   | 0.829    | -0.244   | 0.187    |

|     |        |        |        |        |        |        |        |        |
|-----|--------|--------|--------|--------|--------|--------|--------|--------|
| ALB | -0.054 | 0.772  | 0.021  | 0.912  | 0.157  | 0.398  | -0.172 | 0.356  |
| GLB | 0.243  | 0.187  | 0.202  | 0.275  | 0.231  | 0.211  | -0.031 | 0.869  |
| A/G | -0.299 | 0.102  | -0.248 | 0.178  | -0.199 | 0.284  | -0.093 | 0.620  |
| ALT | 0.164  | 0.378  | 0.364  | 0.044* | 0.307  | 0.093  | -0.009 | 0.961  |
| AST | 0.192  | 0.301  | 0.320  | 0.079  | 0.266  | 0.147  | 0.218  | 0.239  |
| ALP | -0.307 | 0.094  | -0.118 | 0.526  | 0.122  | 0.512  | -0.229 | 0.214  |
| GGT | 0.414  | 0.020* | 0.373  | 0.039* | 0.479  | 0.006* | 0.384  | 0.033* |

---

TG: triglyceride; TC: total cholesterol; HDL: high-density lipoprotein; LDL: low-density lipoprotein; ApoA1: apolipoprotein A1; ApoB: apolipoprotein B; ApoE: apolipoprotein E; Lp(a): lipoprotein(a); hs-CRP: high-sensitivity C-reactive protein; ALB: albumin; GLB: globulin; A/G: the ratio of albumin to globulin; ALT: alanine aminotransferase; AST: aspartate aminotransferase; ALP: alkaline phosphatase; GGT:  $\gamma$ -glutamyl transpeptidase

The *P* values were adjusted by age, history of smoking, diabetes and hypertension \* *P* < 0.05
