# Supplementary material for: GCKGene-Body Hypomethylation Is Associated with the Risk of Coronary Heart Disease
Source: Hindawi journal article supplement (doi:10.1155/2014/151723), 2014-01-01
Supplement: f2 [file 151723.f2.pdf]

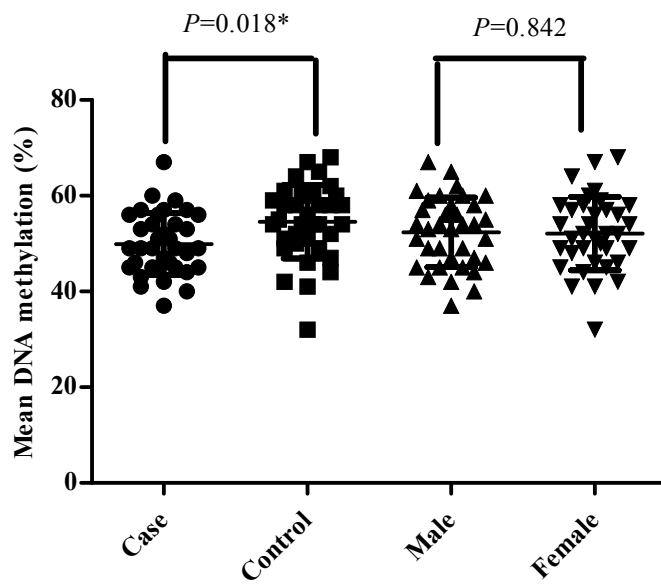

The methylation level was showed with mean± SD  
The P values were adjusted by age, history of smoking, diabetes and hypertension  
\*  $P < 0.05$
