# Supplementary material for: GCKGene-Body Hypomethylation Is Associated with the Risk of Coronary Heart Disease
Source: Hindawi journal article supplement (doi:10.1155/2014/151723), 2014-01-01
Supplement: f3 [file 151723.f3.pdf]

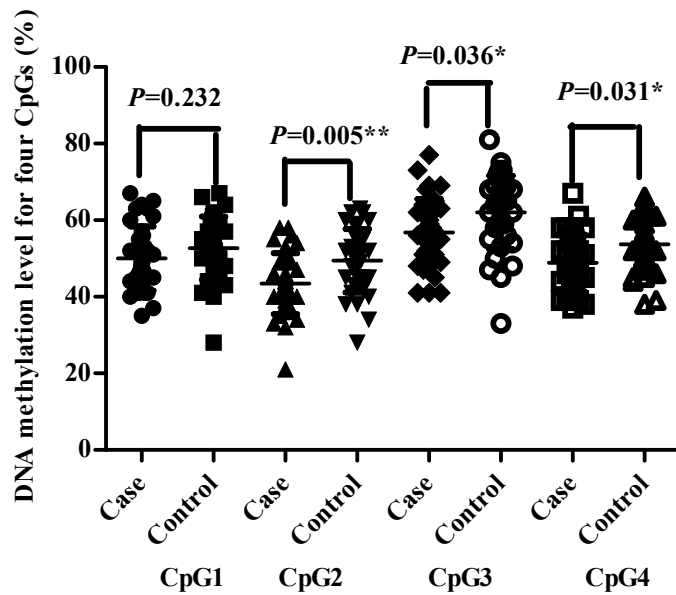

The methylation level was showed with mean± SD  
 The P values were adjusted by age, history of smoking, diabetes and hypertension  
 \*  $P < 0.05$  \*\*  $P < 0.01$
